# Supplementary material for: Fragmented mitochondrial genomes of the rat lice, Polyplax asiatica and Polyplax spinulosa: intra-genus variation in fragmentation pattern and a possible link between the extent of fragmentation and the length of life cycle
Source: PubMed Central journal article supplement (PMC3901344; doi:10.1186/1471-2164-15-44), 2014-01-18
Supplement: 1471-2164-15-44-S2.pdf [file 1471-2164-15-44-S2.pdf]

**Additional file 2** - PCR primers used to verify the mitochondrial minichromosomes of the rat lice, *Polyplax asiatica* and *Polyplax spinulosa*

| Primer | Target gene             | Sequence (5' to 3')            |
|--------|-------------------------|--------------------------------|
| 57M1F  | <i>atp6</i>             | CTAATGGGGGTTTACATGGTGCTCCTAAC  |
| 57M1R  | <i>atp6</i>             | CTCAAAGCTAAAGGCTTACCTTCCTTCAGC |
| 57M2F  | <i>cob</i>              | GATTTCTTAGGGGTGTCCGTTTTAGGGAGG |
| 57M2R  | <i>cob</i>              | GAGATGAAATAAGGGTGAAAGGCCACTTTG |
| 57M3F  | <i>cox1</i>             | GGGAGTTTAGGGATAATTTATGCCATGAGG |
| 57M3R  | <i>cox1</i>             | CTCCCCATTTTCATCGGAAATTATGTGAG  |
| 57M4F  | <i>cox2</i>             | GACTCGTACCTTTTGCCTAAGGAGTGGGAG |
| 57M4R  | <i>cox2</i>             | CAAGAAGGTCTCTAGGCTCGTAGGAGAG   |
| 57M5F  | <i>trnR</i>             | CAAGTTGGCCTAAGATAATAGGCTTCACC  |
| 57M5R  | <i>trnR</i>             | GGCCGAAACTACATGCTAACAAATAGC    |
| 57M6F  | <i>trnS<sub>1</sub></i> | GGTAAAGAGCGTAACGCCTCTTCCTTGCC  |
| 57M6R  | <i>trnS<sub>1</sub></i> | CCTTGATTAGAAGTCACGGGCAGACTTCC  |
| 57M7F  | <i>nad2</i>             | GGTCTCAGTTTCCTTGGACTAACTCAGC   |
| 57M7R  | <i>nad2</i>             | GAAGAAATTAATCCCTCTCTGCCCTAGCC  |
| 57M8F  | <i>nad4</i>             | GGAAGCATTATCCTGGCCGGATACCTTC   |
| 57M8R  | <i>nad4</i>             | CCTAAGGGGAGCCTCCACATGAGCCTTTG  |
| 57M9F  | <i>nad5</i>             | CATTCCTCCACCTTGGTTACTGCTGGTC   |
| 57M9R  | <i>nad5</i>             | CTAAACTTCTAACTGGGGTAGGTGCCGC   |
| 57M10F | <i>rrnS</i>             | CCTTCCCTGTTATGTTTTGTACACCGCTG  |
| 57M10R | <i>rrnS</i>             | GATATTCGGGCGGCTTCGATTAGGGACATG |
| 57M11F | <i>rrnL</i>             | CCTGTAGAGCTTTAATCTGGCTAAACCAG  |
| 57M11R | <i>rrnL</i>             | GTCTTCTCGTCCCTCTATCCTATCTGGGAG |

|         |             |                                |
|---------|-------------|--------------------------------|
| 301M1F  | <i>atp6</i> | GGGAGGGGCTATCTACATGTTCTCAAAG   |
| 301M1R  | <i>atp6</i> | CATATGGGGAGGCAAATTGTCAATCTCC   |
| 301M2F  | <i>cob</i>  | GGGCTAAGTCCTCATTCCCATAAAGTAGC  |
| 301M2R  | <i>cob</i>  | GGGGTTTGATCTTCCCTTTTCGTGGAG    |
| 301M3F  | <i>cox1</i> | GGCGAGCTTATTTTACTAGGGCAACGATG  |
| 301M3R  | <i>cox1</i> | CATCTAGCCCAACAGTGAATATGTGGTGCG |
| 301M4F  | <i>cox2</i> | CTGGTCATACGAAGAGTATAAGCCTCAGC  |
| 301M4R  | <i>cox2</i> | GGCCAATTACCTTGGATATAATCGCTGG   |
| 301M5F  | <i>trnR</i> | CGGCCTAACAGAATCTAGAAAGATTGGTC  |
| 301M5R  | <i>trnR</i> | CCGCATAAATCATGCTCTTGCCCATAAGC  |
| 301M6F  | <i>trnG</i> | CCAGTTAAAAGGTCCCGGCAAAGGGTTAAG |
| 301M6R  | <i>trnG</i> | CTTAAGATTTCGCCTATTAAGCTCCCTAGC |
| 301M7F  | <i>nad2</i> | GATCGAGGAGTCAATTCGACGGGCTATAG  |
| 301M7R  | <i>nad2</i> | CTCCCTTGATTGAAACAAGAGTCGAGAGG  |
| 301M8F  | <i>nad4</i> | GCATCTACCTCTGGTAGAGTGTTGTTAGCG |
| 301M8R  | <i>nad4</i> | CAACATGCGCCTTTGGCAGCCAGTAATGA  |
| 301M9F  | <i>nad5</i> | GAGGACGACAAGACTCTCGGTCTCTTATTC |
| 301M9R  | <i>nad5</i> | CTCCTCATGGAGAATAACTCCTGCAACC   |
| 301M10F | <i>rrnS</i> | CAGTAAACGAAACTGCCCGAACACTTTAC  |
| 301M10R | <i>rrnS</i> | CATATGCCTCTGAATAGACTCTCTACCGCC |
| 301M11F | <i>rrnL</i> | GAAGGCTAGAATGAAAGGGTAAACCGAGG  |
| 301M11R | <i>rrnL</i> | GGCAAATTATTATGCTACCTTAGCACGGTC |

---

Note: Primers with “57” are for *Polyplax asiatica*; those with “301” are for *Polyplax spinulosa*.
