# Supplementary material for: Fragmented mitochondrial genomes of the rat lice, Polyplax asiatica and Polyplax spinulosa: intra-genus variation in fragmentation pattern and a possible link between the extent of fragmentation and the length of life cycle
Source: PubMed Central journal article supplement (PMC3901344; doi:10.1186/1471-2164-15-44), 2014-01-18
Supplement: 1471-2164-15-44-S4.pdf [file 1471-2164-15-44-S4.pdf]

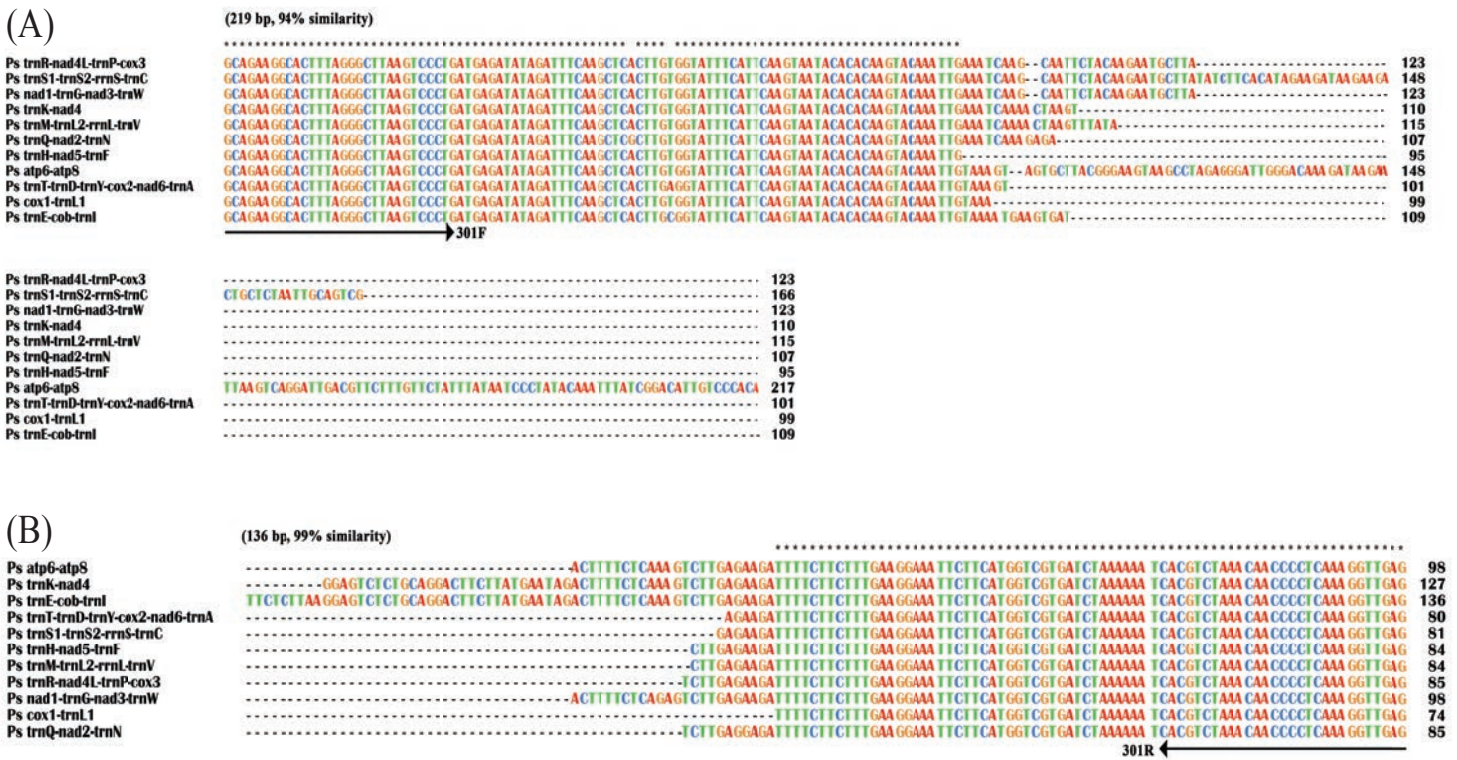

**Additional file 4** - Alignment of nucleotide sequences of parts of the non-coding regions upstream (A) and downstream (B) of the coding regions of the 11 mitochondrial minichromosomes of *Polyplax spinulosa*, the louse of the Asian house rat, *Rattus tanezumi*. 301F and 301R are the primers used to amplify the coding regions of all mitochondrial minichromosomes of *Polyplax spinulosa*.
